# Supplementary material for: Rosiglitazone Suppresses Calcium Oxalate Crystal Binding and Oxalate-Induced Oxidative Stress in Renal Epithelial Cells by Promoting PPAR-γ Activation and Subsequent Regulation of TGF-β1 and HGF Expression
Source: Oxid Med Cell Longev. 2019 Nov 12;2019:4826525. doi: 10.1155/2019/4826525 (PMC6875173; doi:10.1155/2019/4826525)
Supplement: Supplementary Materials — Table S1: the siRNA sequences for the HGF gene. Figure S1: the expression of related proteins in vitro is indicated by a graphical representation (A-H). The expression level of PPAR-γ in the cytoplasm and nucleus in vitro is illustrated by a graphical representation (I). Figure S2: the expression of proteins in vivo is illustrated by a graphical representation (A-H). The expression level of PPAR-γ in the cytoplasm and nucleus in vivo is illustrated by a graphical representation (I). Figure S3: black-stained crystals in the whole cross-section were observed in original pictures of kidney Pizzolato staining under a 10-fold magnification. Figure S4: histopathological and morphological changes of the kidney were observed in different groups under a 200-fold magnification. [file 4826525.f1.pdf]

**Additional files****Table S1.** The siRNA sequences for the HGF gene.

| siRNA                           | Sense (5'-3')         |
|---------------------------------|-----------------------|
| Si-NC (random control sequence) | UUCUCCGAACGUGUCACGUTT |
| si-HGF-1                        | GUAAAGACCUACAGGAAAATT |
| si-HGF-2                        | CAUGACAAGUGGAGUGAAATT |
| si-HGF-3                        | GGGUAAAGACCUACAGGAATT |

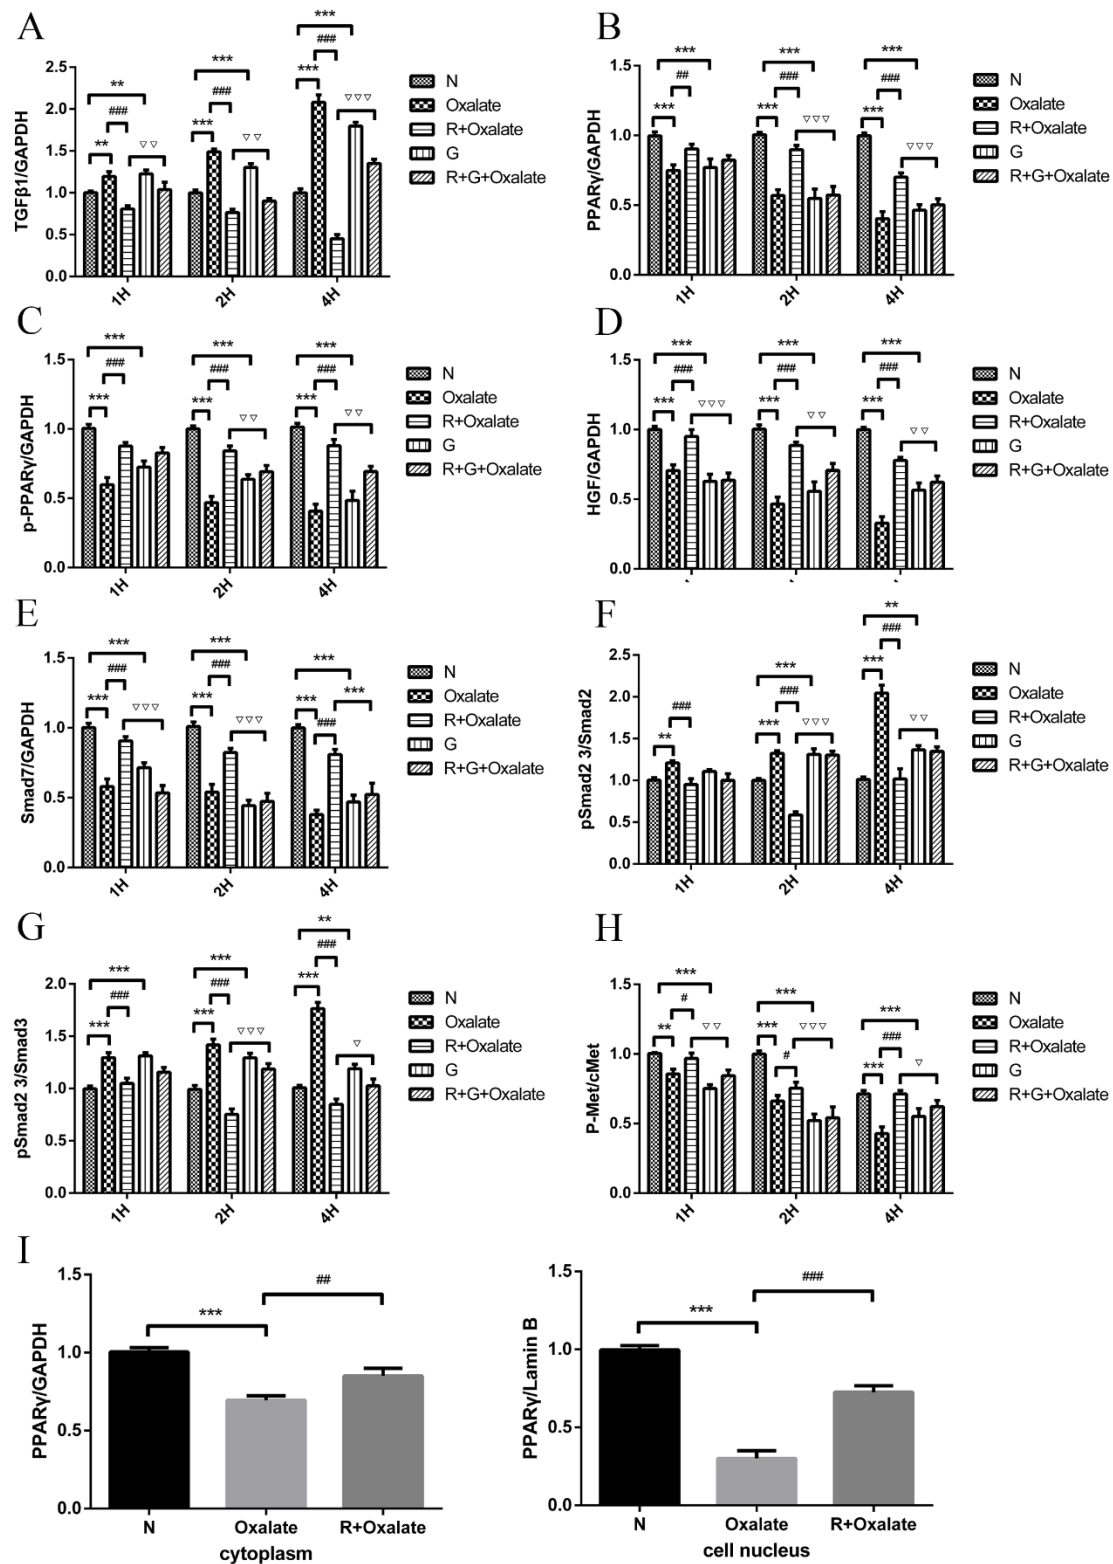

Figure S1. The expression of related proteins *in vitro* was indicated by graphical representation (A-H). The expression level of PPAR-γ in cytoplasm and nucleus *in vitro* was illustrated by graphical representation (I). N: normal, R: rosiglitazone, G: GW9662, H: hour. \*\*p < 0.01 and \*\*\*p < 0.001 versus the control group; #p < 0.05 and ###p < 0.001 versus the 0.5 mM oxalate group; ∇p < 0.05, ∇∇p < 0.01 and ∇∇∇p < 0.001 versus the RSG-treated group.

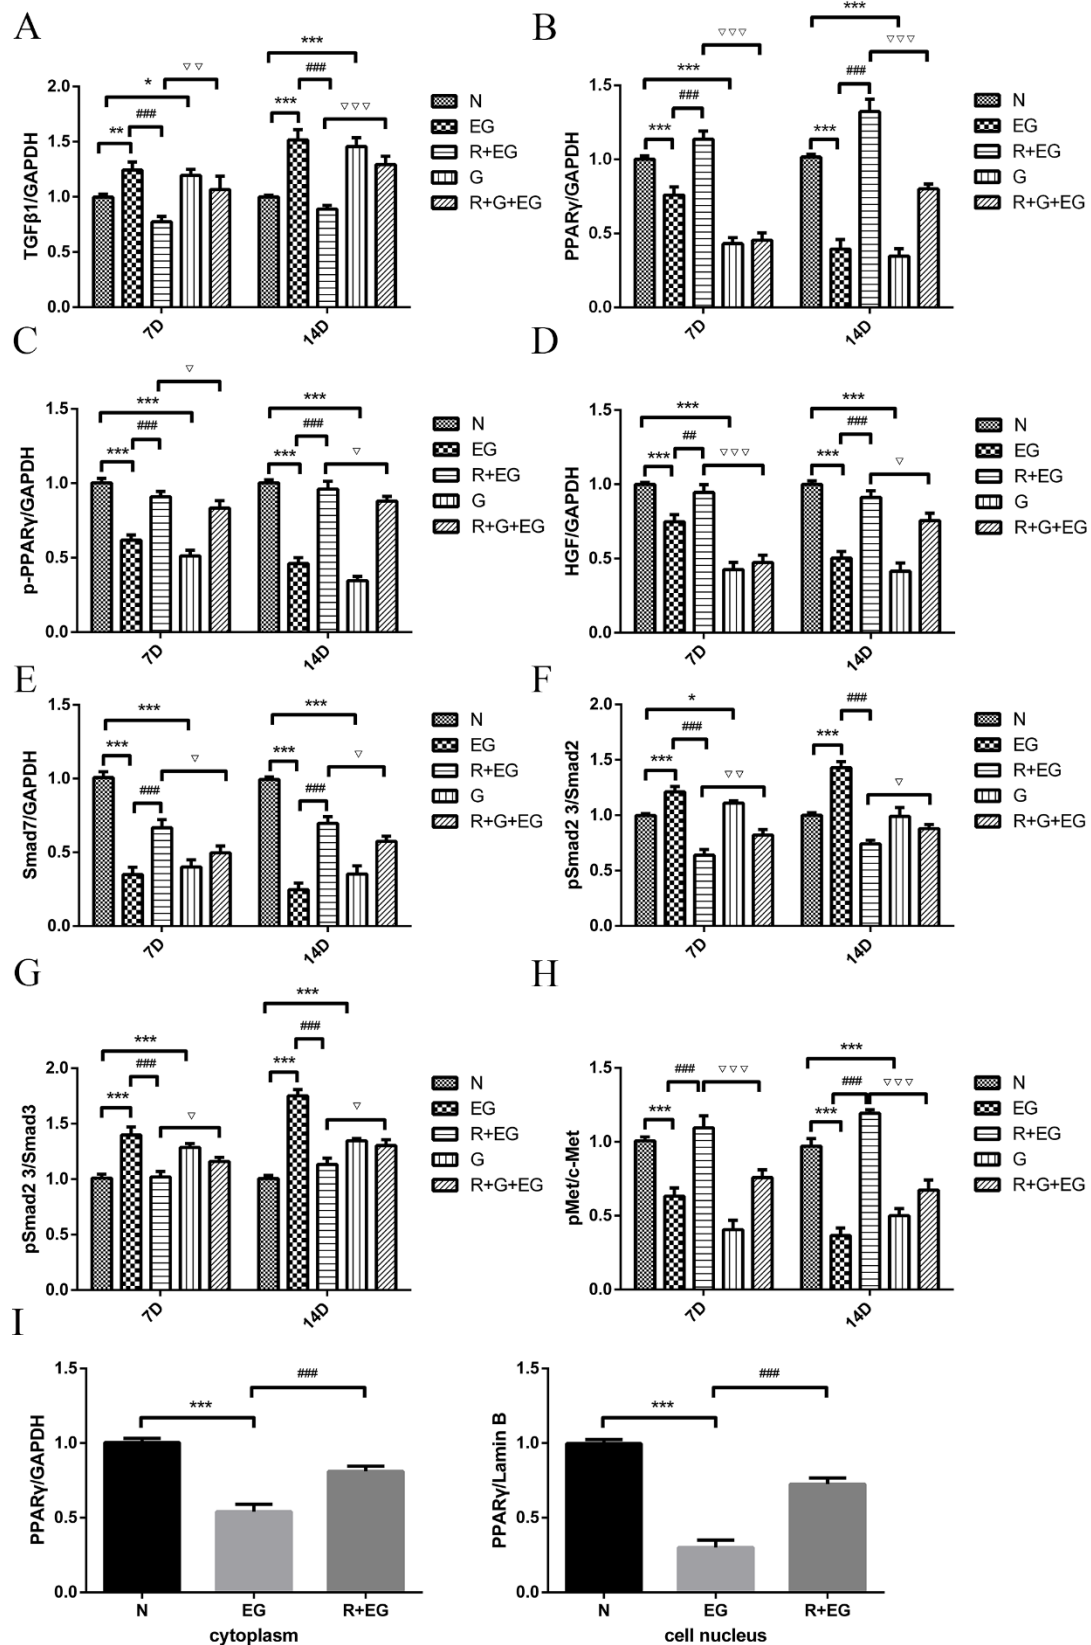

Figure S2. The expression of proteins *in vivo* was displayed by graphical representation (A-H). The expression level of PPAR- $\gamma$  in cytoplasm and nucleus *in vivo* was illustrated by graphical representation (I). N: normal, EG: ethylene glycol, R: rosiglitazone, G: GW9662, H: hour. \*p < 0.05, \*\*p < 0.01 and \*\*\*p

< 0.001 versus the control group; <sup>##</sup>p < 0.01, and <sup>###</sup>p < 0.001 versus EG group; <sup>▽</sup>p < 0.05, <sup>▽▽</sup>p < 0.01 and <sup>▽▽▽</sup>p < 0.001 versus the RSG-treated group.

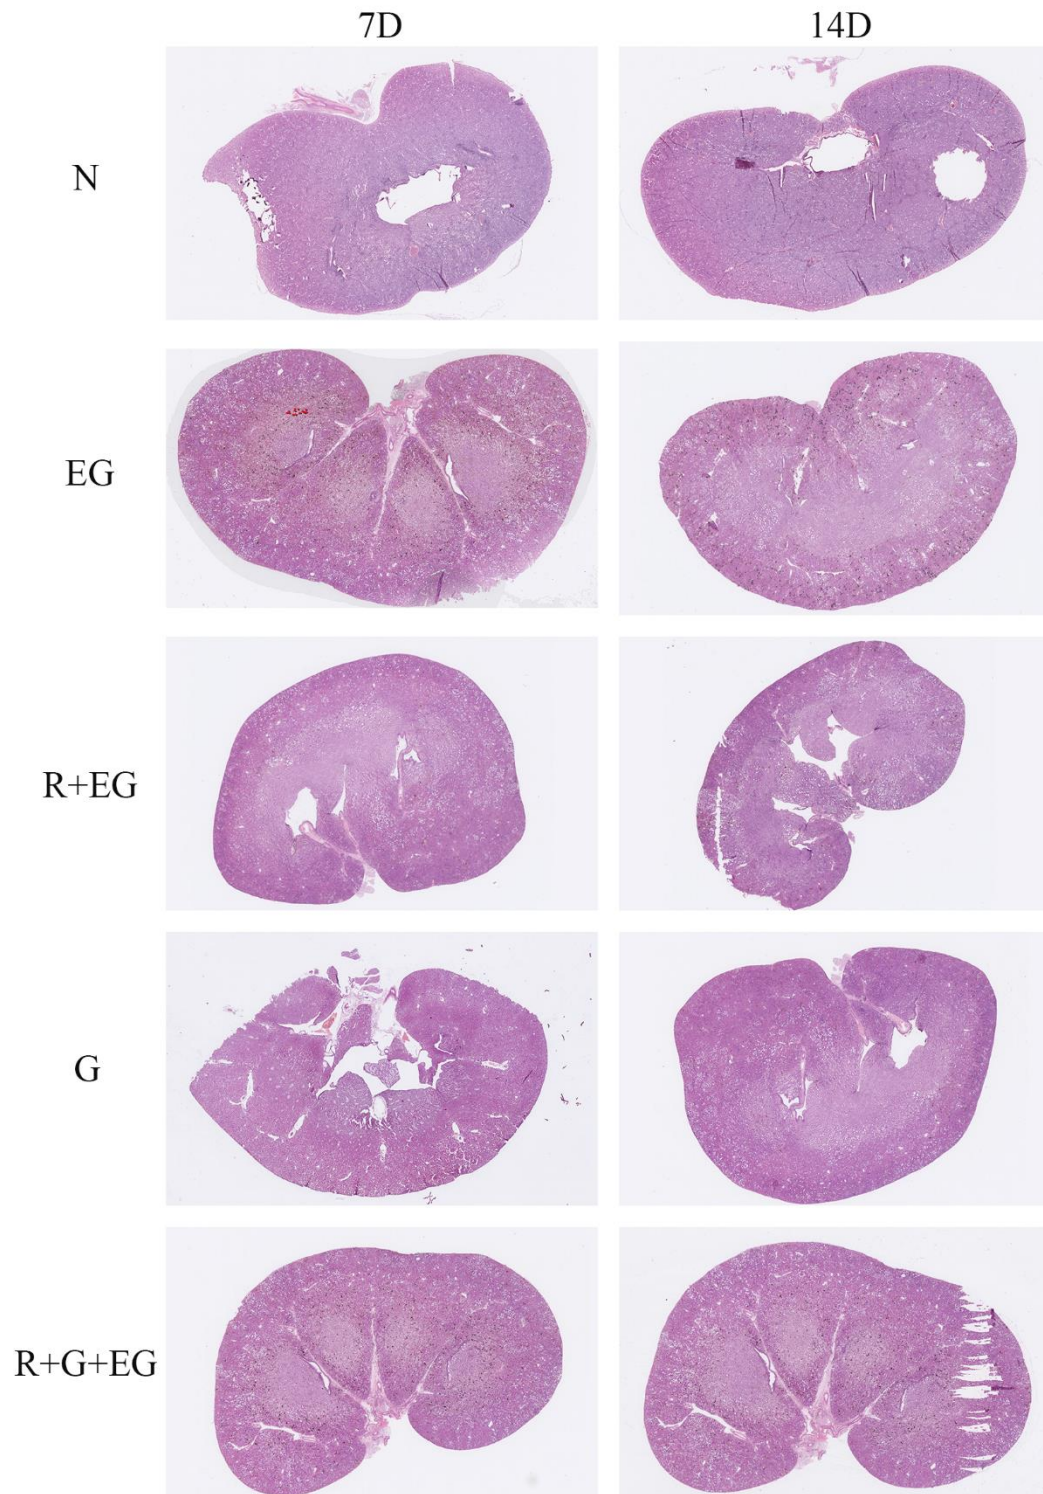

Figure S3. Black stained crystals in the whole cross-section were observed in original pictures of kidney Pizzolato staining under 10-fold magnification field.

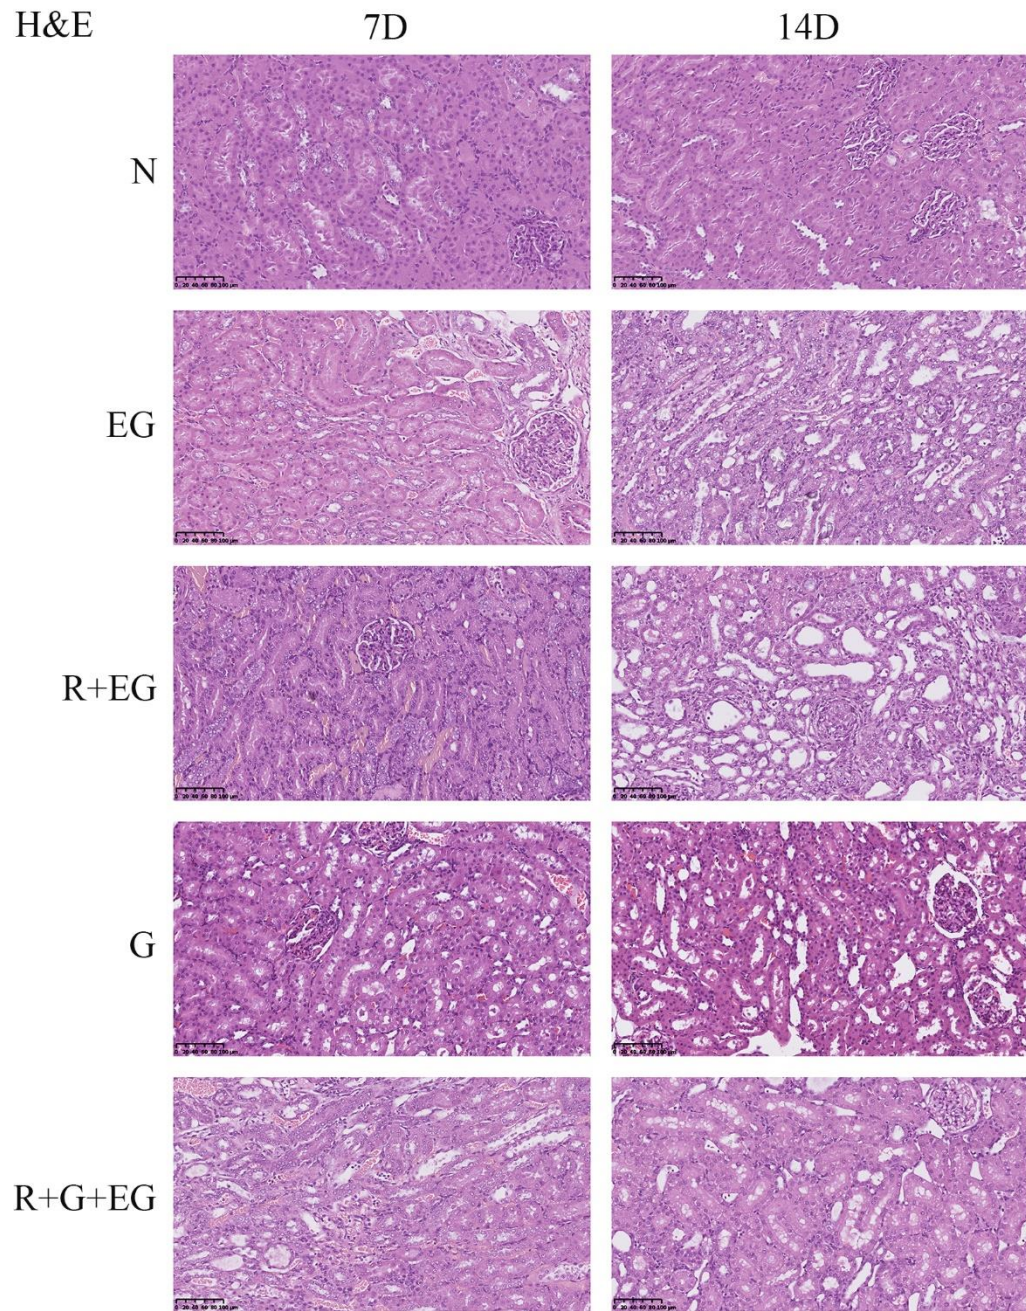

Figure S4. Histopathological and morphological changes of kidney were observed in different groups under a 200-fold magnification.
